# Supplementary material
Source: Springer Nature journal article supplement (https://www.springermedizin.de/resource/supplementary/12889_2005_384_MOESM3_ESM.pdf/9501460)

Frequency

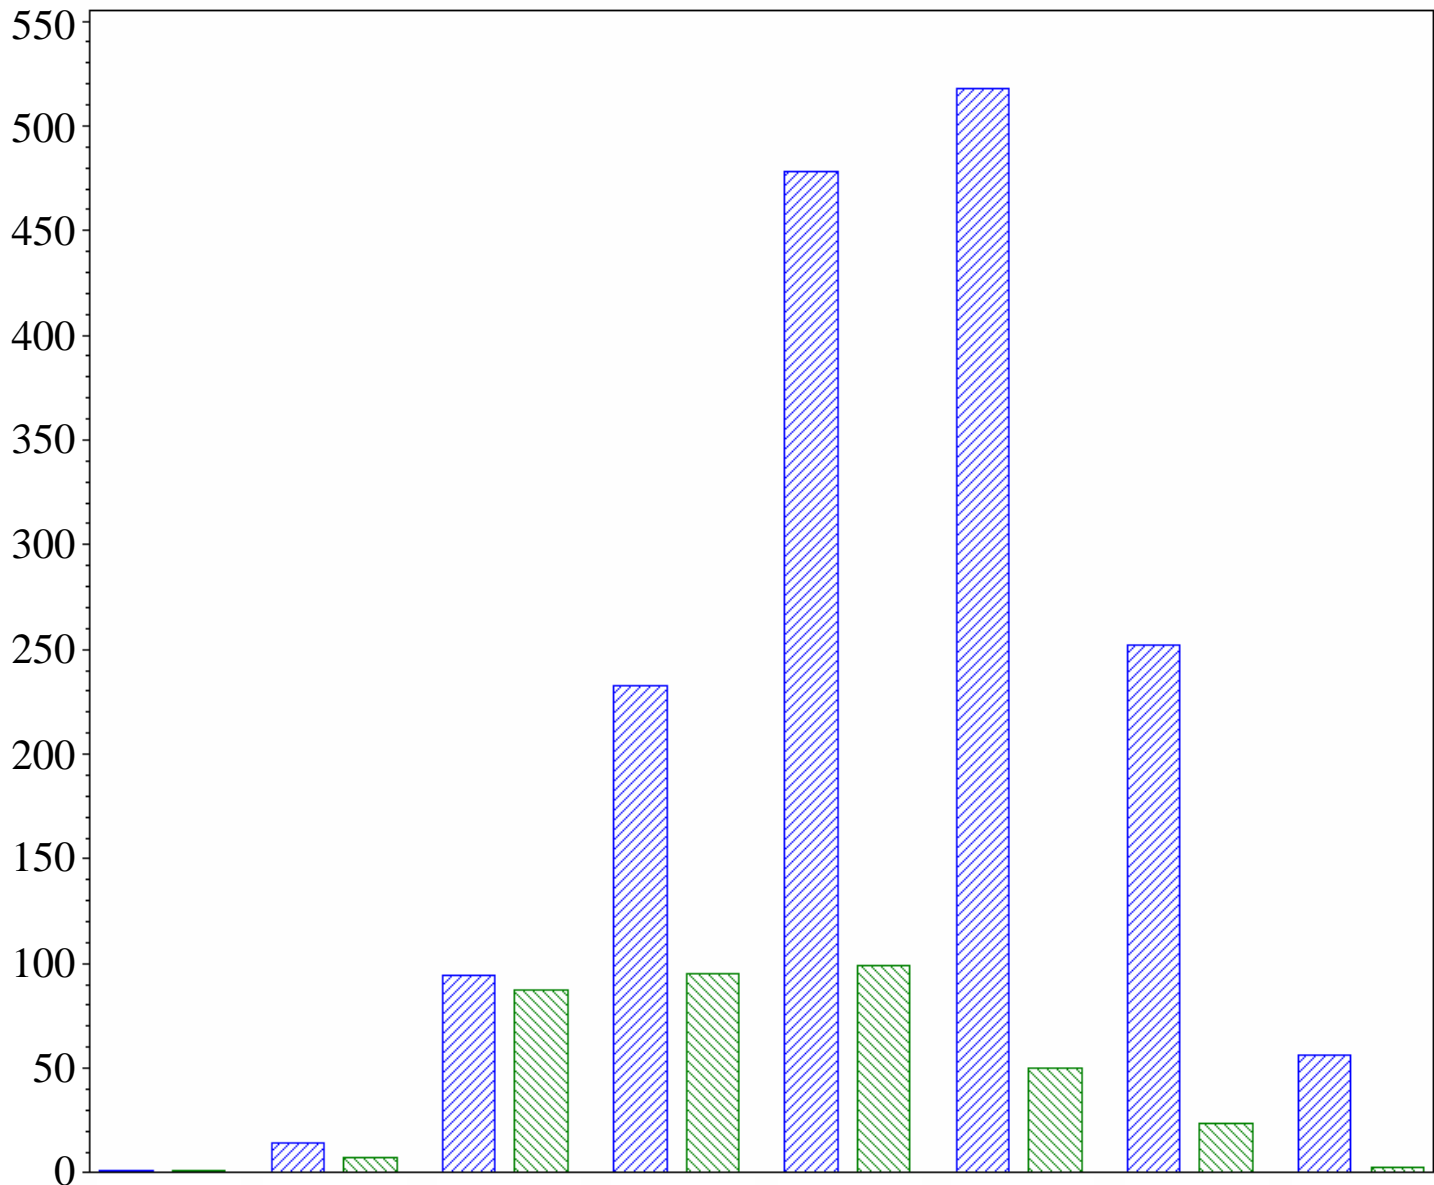

F M F M F M F M F M F M F M SEX  
20-29 30-39 40-49 50-59 60-69 70-79 80-89 90-99 AGE

Supplement: MOESM3 [file 9501460]
